# Supplementary material for: Extra Virgin Olive Oil Prevents the Age-Related Shifts of the Distribution of HDL Subclasses and Improves Their Functionality
Source: MDPI journal article supplement (doi:10.3390/nu13072235), 2021-06-29
Supplement: s1 [file s1]

**Supplementary Table S1.** Chemical composition of extra virgin olive oil used in the study [1].

| Fatty Acids (%)                      | EVOO    |
|--------------------------------------|---------|
| C16:0                                | 10.4    |
| C18:0                                | 2.76    |
| C18:1 n-9                            | 71.0    |
| C18:2 n-6                            | 12.9    |
| C18:3 n-3                            | 1.04    |
| Sterols (mg/100g oil)                | 319     |
| Schottenol                           | 0       |
| Spinasterol                          | 0       |
| Stigmasta-8,22-dien-3 $\beta$ -ol    | 0       |
| $\beta$ -Sitostérol                  | 156     |
| Campesterol                          | 12      |
| Others                               | 151     |
| Tocopherols (mg/Kg oil)              | 257     |
| $\alpha$                             | 190     |
| $\delta$                             | 42      |
| $\gamma$                             | 26      |
| Phenolic Compounds ( $\mu$ g/Kg oil) | 792 983 |
| Vanillic acid                        | 359     |
| Syringic acid                        | 0       |
| Ferulic acid                         | 51      |
| Tyrosol                              | 19 573  |
| Others                               | 773 000 |

**Supplementary Table S2.** Anthropometric and biochemical characteristics of the participants at baseline.

|                            | Total (n = 84)     | Young (n = 27)    | Elderly (n = 57)   |        |
|----------------------------|--------------------|-------------------|--------------------|--------|
| Age (years)                | 58.21 $\pm$ 19.22  | 31.81 $\pm$ 6.79  | 70.72 $\pm$ 5.6    | <0.001 |
| Male                       | 35                 | 15                | 20                 |        |
| Female                     | 49                 | 12                | 37                 |        |
| BMI                        | 25.83 $\pm$ 4.24   | 24.37 $\pm$ 3.16  | 26.51 $\pm$ 4.53   | 0.033  |
| Systolique pressure        | 127.32 $\pm$ 18.48 | 113.56 $\pm$ 8.43 | 133.72 $\pm$ 18.42 | <0.001 |
| Diastolique pressure       | 77.37 $\pm$ 9.55   | 70.52 $\pm$ 7.84  | 80.54 $\pm$ 8.6    | <0.001 |
| Total cholesterol (mmol/l) | 5.23 $\pm$ 0.99    | 4.63 $\pm$ 0.95   | 5.52 $\pm$ 0.88    | <0.001 |
| Triglycerides (mmol/l)     | 1.31 $\pm$ 0.83    | 1.19 $\pm$ 0.99   | 1.37 $\pm$ 0.74    | 0.032  |
| HDL-C (mmol/l)             | 1.46 $\pm$ 0.38    | 1.38 $\pm$ 0.33   | 1.5 $\pm$ 0.4      | 0.289  |
| LDL-C (mmol/l)             | 3.16 $\pm$ 0.83    | 2.7 $\pm$ 0.76    | 3.4 $\pm$ 0.78     | <0.001 |
| CT/HDL-C                   | 3.81 $\pm$ 1.25    | 3.62 $\pm$ 1.4    | 3.92 $\pm$ 1.16    | 0.113  |
| Glucose (mmol/l)           | 4.56 $\pm$ 0.57    | 4.18 $\pm$ 0.46   | 4.73 $\pm$ 0.56    | <0.001 |

Results are presented as MEAN SD, *p*: comparison between young and elderly Mann-Whitney test,  $\alpha$  = 0.05.

## References

1. Helal, O.; Berrougui, H.; Loued, S.; Khalil, A. Extra-virgin olive oil consumption improves the capacity of HDL to mediate cholesterol efflux and increases ABCA1 and ABCG1 expression in human macrophages. *Br. J. Nutr.* **2013**, *109*, 1844–1855.
